# Supplementary material for: Dnmt3a2 expression during embryonic development is required for phenotypic stability
Source: Research Square preprint supplement (doi:10.21203/rs.3.rs-6908216/v1), 2025-07-01
Supplement: Supplementary file 1 [file e429bae4d6e43a3e8379e9cf.docx]

**Supplementary information: Dnmt3a2 expression during embryonic development is required for phenotypic stability**

**Supplementary Table 1:** Oligonucleotides and primer sequences used in this study.

| **gRNA sequences** | |
| --- | --- |
| m3a1in5g crRNA1 | /AltR1/rGrArCrUrGrUrUrGrArCrGrGrArGrUrCrArCrGrGrGrUrUrUrUrArGrArGrCrUrArUrGrCrU/AltR2/ |
| m3a1in6g crRNA2 | /AltR1/rGrCrArCrUrArGrGrArGrUrUrArArCrCrGrUrArGrGrUrUrUrUrArGrArGrCrUrArUrGrCrU/AltR2/ |
| mD3A2p5 crRNA1 | /AltR1/rCrGrArGrUrCrCrCrCrCrGrGrGrUrCrArCrArArUrGrUrUrUrUrArGrArGrCrUrArUrGrCrU/AltR2/ |
| mD3A2p3 crRNA2 | /AltR1/rUrGrGrGrArUrArGrCrCrCrArArArArCrCrGrCrGrGrUrUrUrUrArGrArGrCrUrArUrGrCrU/AltR2/ |
| **Genotyping Primers** | |
| m3a1ex5F | GGCACATGAACAAGCAAACACTAGGAG |
| m3a1ex5R | CCTCTCCCTCTCACAAGGAACAACC |
| m3a1ex6F | GATGCCAAGTGTGGAACTGGCAAAC |
| m3a1ex6R | CCTTGGTTCTGTCCTCAGCCATCAGAA |
| 3A2GT5F | TGCGTGGGAGTGTGTCTATT |
| 3A2GT5R | GCCCCAGGACAATAACTTCA |
| 3A2GT3F | TGGACAGAGTCCTGGGGATA |
| 3A2GT3R | CACAGGTCAACAGGAACTGC |
| **Primers for Bi-sulfite sequencing** | |
| **Region of Interest** | **Primer sequence** |
| H19 ICR Set1 F | GAGTATTTAGGAGGTATAAGAATT |
| H19 ICR Set1 R | ATCAAAAACTAACATAAACCCCT |
| H19 ICR Set2 F | GTAAGGAGATTATGTTTTATTTTTGG |
| H19 ICR Set2 R | CCTCATAAAACCCATAACTAT |
| H19 ROI2 F | TAGTTTGGTTTTGGTTATTTTAGTTAAT |
| H19 ROI2 R | CATCTAAAACTACTCTACTCTCTAATAC |
| Snrpn F | ATGGTGTTTTGTTTTTTTTATTTTAGAA |
| Snrpn R | AAATCCTAACTATCCTAAAACTCATATT |
| Grb10 F | TAATAATTAGATTTGTAAAGGGAGGAG |
| Grb10 R | AAAAAATTCTATAACATAACCACCCTAA |

**Supplementary Table 2:** dMRM parameters.

| | | **Compound name** | **Precursor (m/z)** | **Product (m/z)** | **RT (min)** | | **Fragmentor (V)** | | **CE (V)** | **Polarity** | | --- | --- | --- | --- | --- | --- | --- | --- | --- | | **2'deoxycytidine** | 228 | 112 | | 4.3 | | 50 | 5 | + | | 228 | 95 | | 4.3 | | 50 | 40 | + | | **[13C515N] 2'deoxycytidine** | 231 | 115 | | 4.3 | | 55 | 30 | + | | 231 | 157 | | 4.3 | | 140 | 15 | + | | 231 | 98 | | 4.3 | | 50 | 40 | + | | **2'deoxyguanosine** | 268 | 152 | | 7.7 | | 25 | 20 | + | | 268 | 135 | | 7.7 | | 40 | 50 | + | | 268 | 110 | | 7.7 | | 5 | 40 | + | | **[13C515N] 2'deoxyguanosine** | 271 | 155 | | 7.7 | | 30 | 5 | + | | 271 | 117 | | 7.7 | | 100 | 15 | + | | **5-methyl-2'deoxycytidine** | 242 | 126 | | 9.1 | | 50 | 10 | + | | 242 | 108 | | 9.1 | | 50 | 40 | + | | **[D3] 5-methyl-2'deoxycytidine** | 245 | 129 | | 9.1 | | 50 | 10 | + | | 245 | 117 | | 9.1 | | 55 | 15 | + | | **2'deoxythymidine** | 243 | 127 | | 9.2 | | 50 | 10 | + | | 243 | 117 | | 9.2 | | 50 | 10 | + | | **2'deoxyadenosine** | 252 | 136 | | 10.1 | | 50 | 10 | + | | 252 | 119 | | 10.1 | | 100 | 50 | + | | 252 | 43 | | 10.1 | | 100 | 40 | + | | **[13C515N] 2'deoxythymidine** | 255 | 134 | | 10.65 | | 40 | 2 | + | | 255 | 122 | | 10.65 | | 25 | 15 | + | | **2'deoxyuridine** | 229 | 211 | | 4.4 | | 8 | 5 | + | | 229 | 113 | | 4.4 | | 50 | 20 | + | | | --- | --- | --- | --- | --- | --- | --- | --- | --- | --- | --- | --- | --- | --- | --- | --- | --- | --- | --- | --- | --- | --- | --- | --- | --- | --- | --- | --- | --- | --- | --- | --- | --- | --- | --- | --- | --- | --- | --- | --- | --- | --- | --- | --- | --- | --- | --- | --- | --- | --- | --- | --- | --- | --- | --- | --- | --- | --- | --- | --- | --- | --- | --- | --- | --- | --- | --- | --- | --- | --- | --- | --- | --- | --- | --- | --- | --- | --- | --- | --- | --- | --- | --- | --- | --- | --- | --- | --- | --- | --- | --- | --- | --- | --- | --- | --- | --- | --- | --- | --- | --- | --- | --- | --- | --- | --- | --- | --- | --- | --- | --- | --- | --- | --- | --- | --- | --- | --- | --- | --- | --- | --- | --- | --- | --- | --- | --- | --- | --- | --- | --- | --- | --- | --- | --- | --- | --- | --- | --- | --- | --- | --- | --- | --- | --- | --- | --- | --- | --- | --- | --- | --- | --- | --- | --- | --- | --- | --- | --- | --- | --- | --- | --- | --- | --- | --- | --- | --- | --- | --- | --- | --- | --- | --- | --- | --- | --- | --- | --- | --- | --- | --- | --- | --- | --- | --- | --- | --- | --- | --- | --- | --- | --- | --- | --- | --- | --- | --- | --- | --- | --- | --- | --- | --- | |
| --- | --- | --- | --- | --- | --- | --- | --- | --- | --- | --- | --- | --- | --- | --- | --- | --- | --- | --- | --- | --- | --- | --- | --- | --- | --- | --- | --- | --- | --- | --- | --- | --- | --- | --- | --- | --- | --- | --- | --- | --- | --- | --- | --- | --- | --- | --- | --- | --- | --- | --- | --- | --- | --- | --- | --- | --- | --- | --- | --- | --- | --- | --- | --- | --- | --- | --- | --- | --- | --- | --- | --- | --- | --- | --- | --- | --- | --- | --- | --- | --- | --- | --- | --- | --- | --- | --- | --- | --- | --- | --- | --- | --- | --- | --- | --- | --- | --- | --- | --- | --- | --- | --- | --- | --- | --- | --- | --- | --- | --- | --- | --- | --- | --- | --- | --- | --- | --- | --- | --- | --- | --- | --- | --- | --- | --- | --- | --- | --- | --- | --- | --- | --- | --- | --- | --- | --- | --- | --- | --- | --- | --- | --- | --- | --- | --- | --- | --- | --- | --- | --- | --- | --- | --- | --- | --- | --- | --- | --- | --- | --- | --- | --- | --- | --- | --- | --- | --- | --- | --- | --- | --- | --- | --- | --- | --- | --- | --- | --- | --- | --- | --- | --- | --- | --- | --- | --- | --- | --- | --- | --- | --- | --- | --- | --- | --- | --- | --- | --- | --- | --- | --- | --- | --- | --- |
